# Supplementary material
Source: PubMed Central journal article supplement (PMC7784984)
Supplement: 41431_2020_688_MOESM1_ESM.pdf [file 41431_2020_688_MOESM1_ESM.pdf]

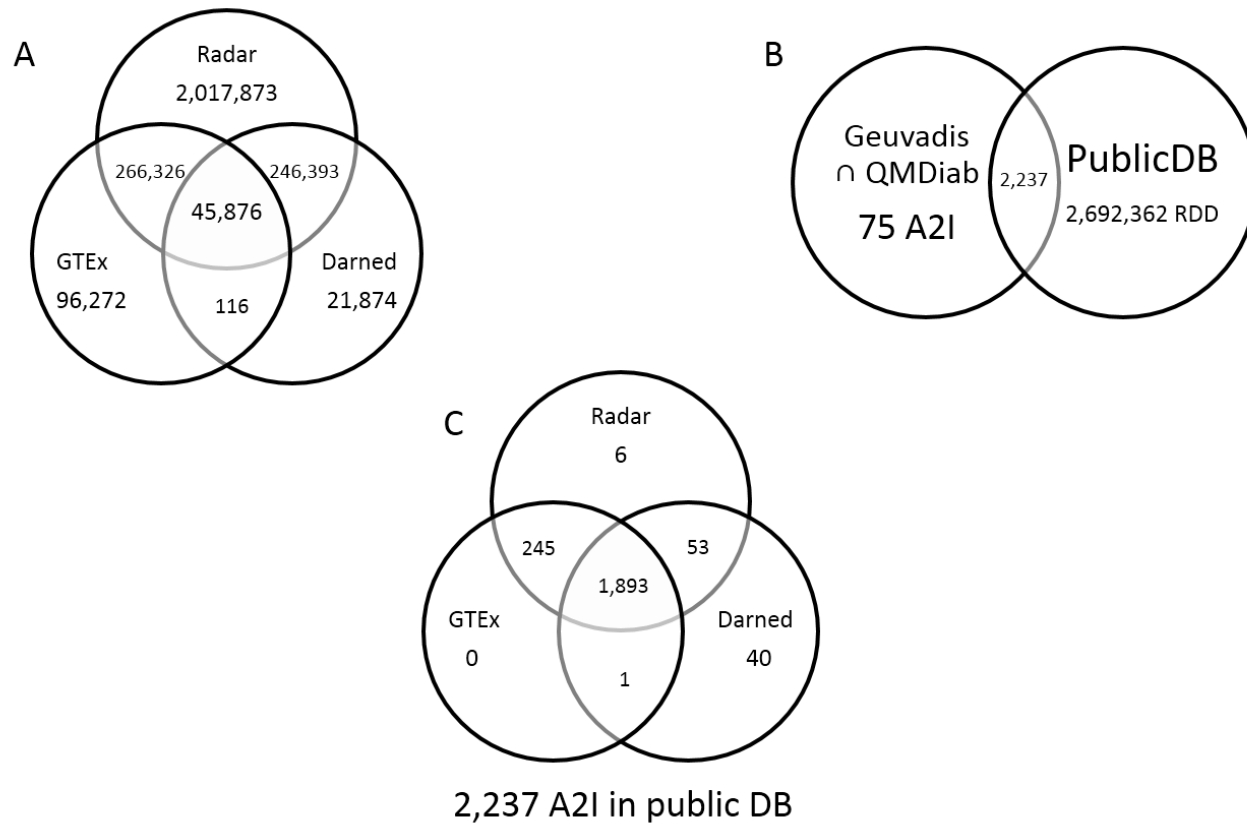

**Fig S1. Distribution of detected RDD in public databases.**

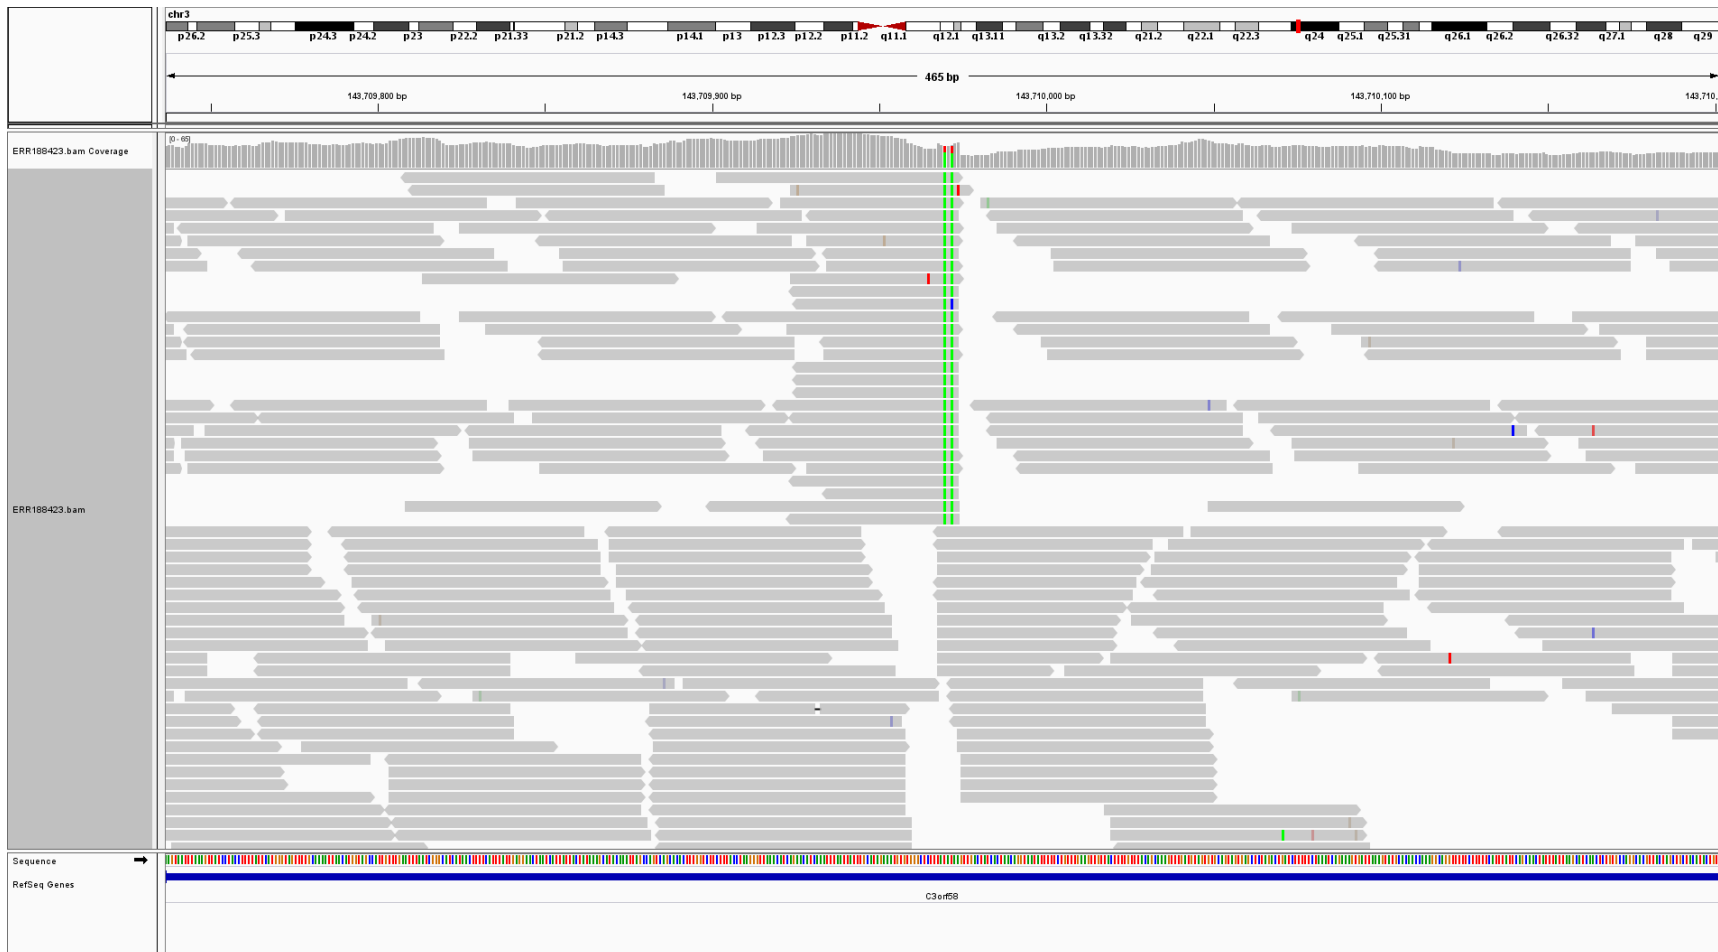

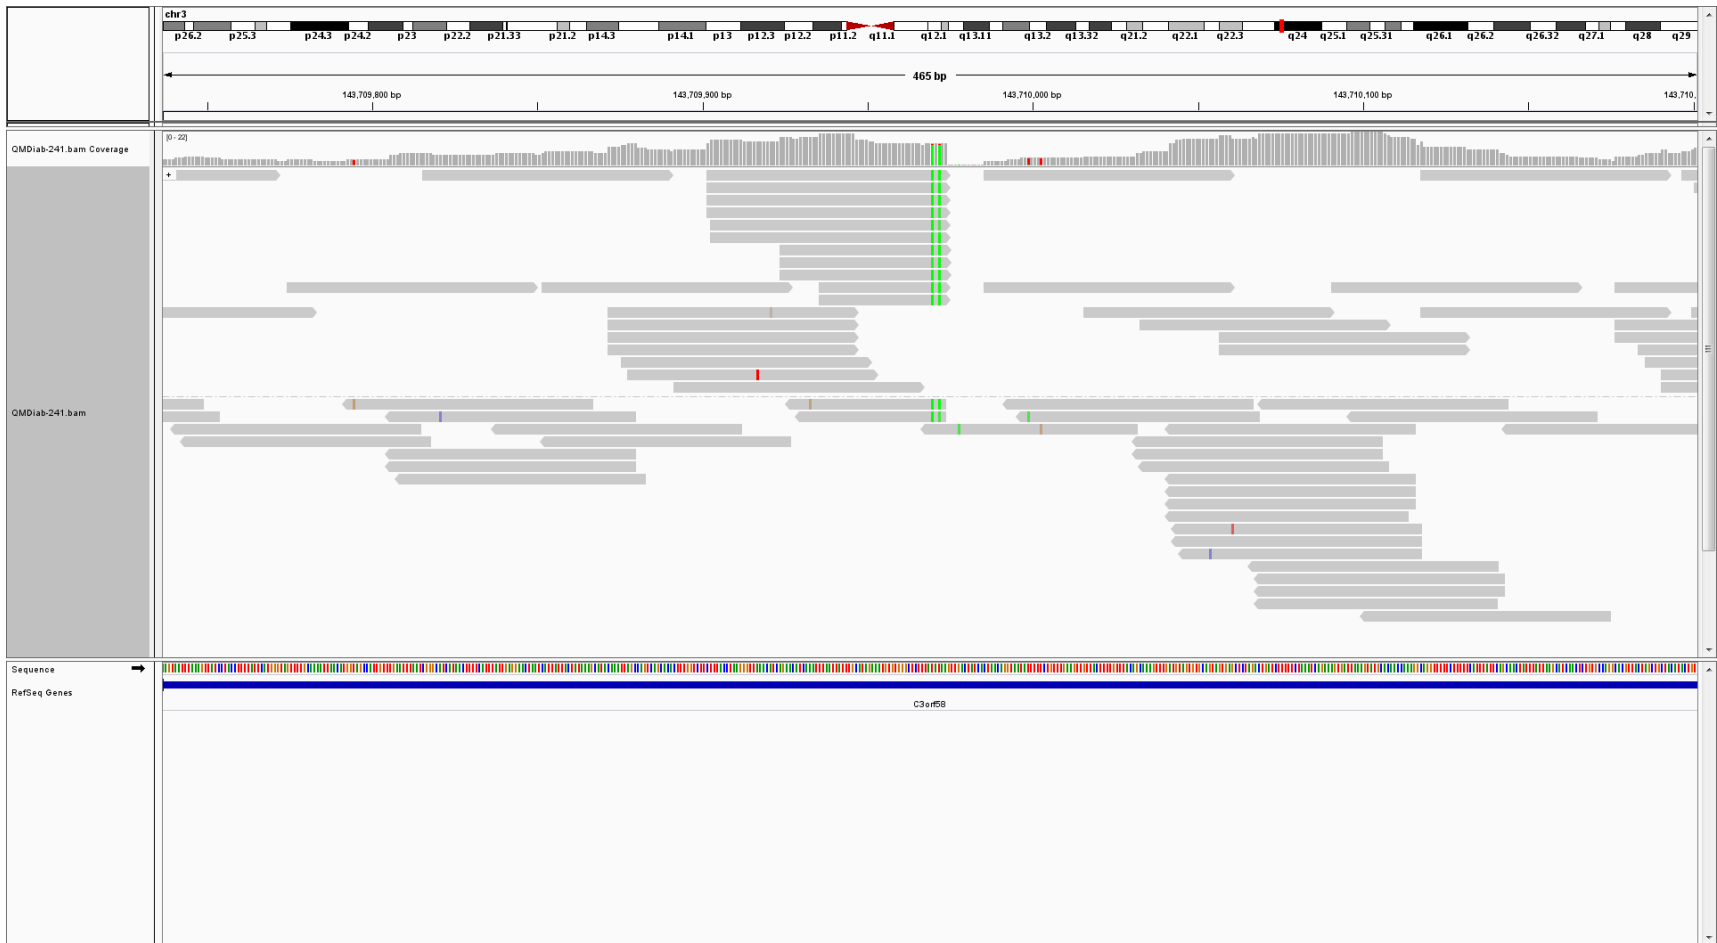

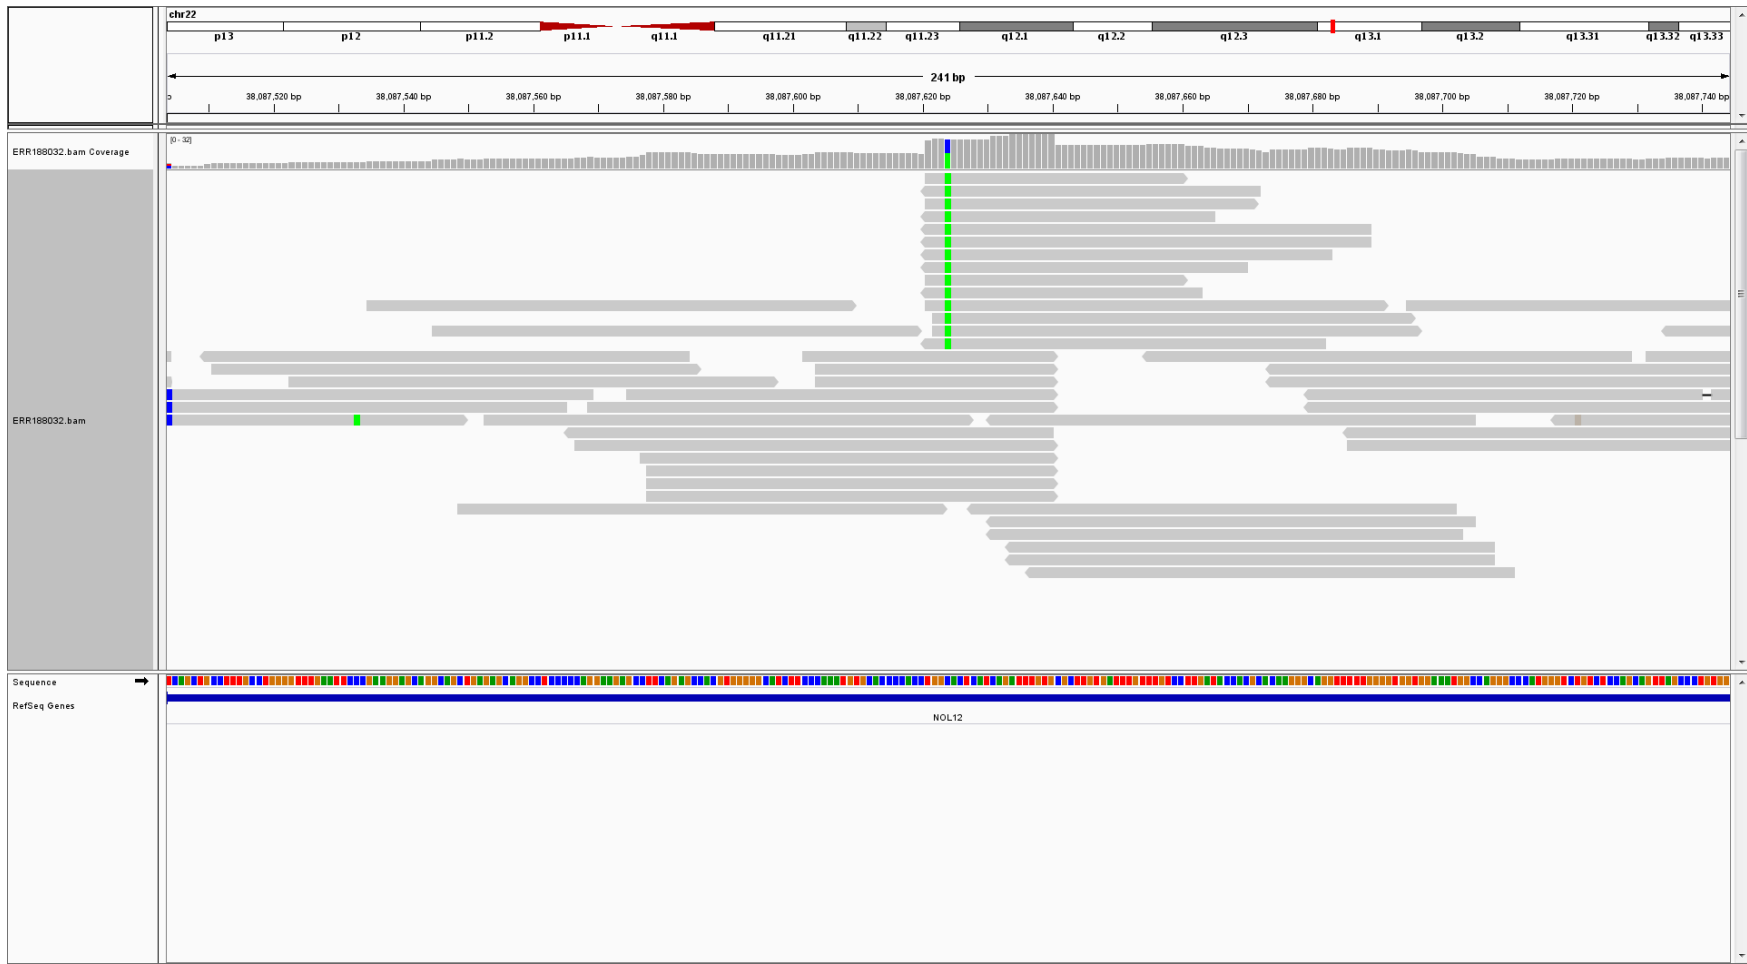

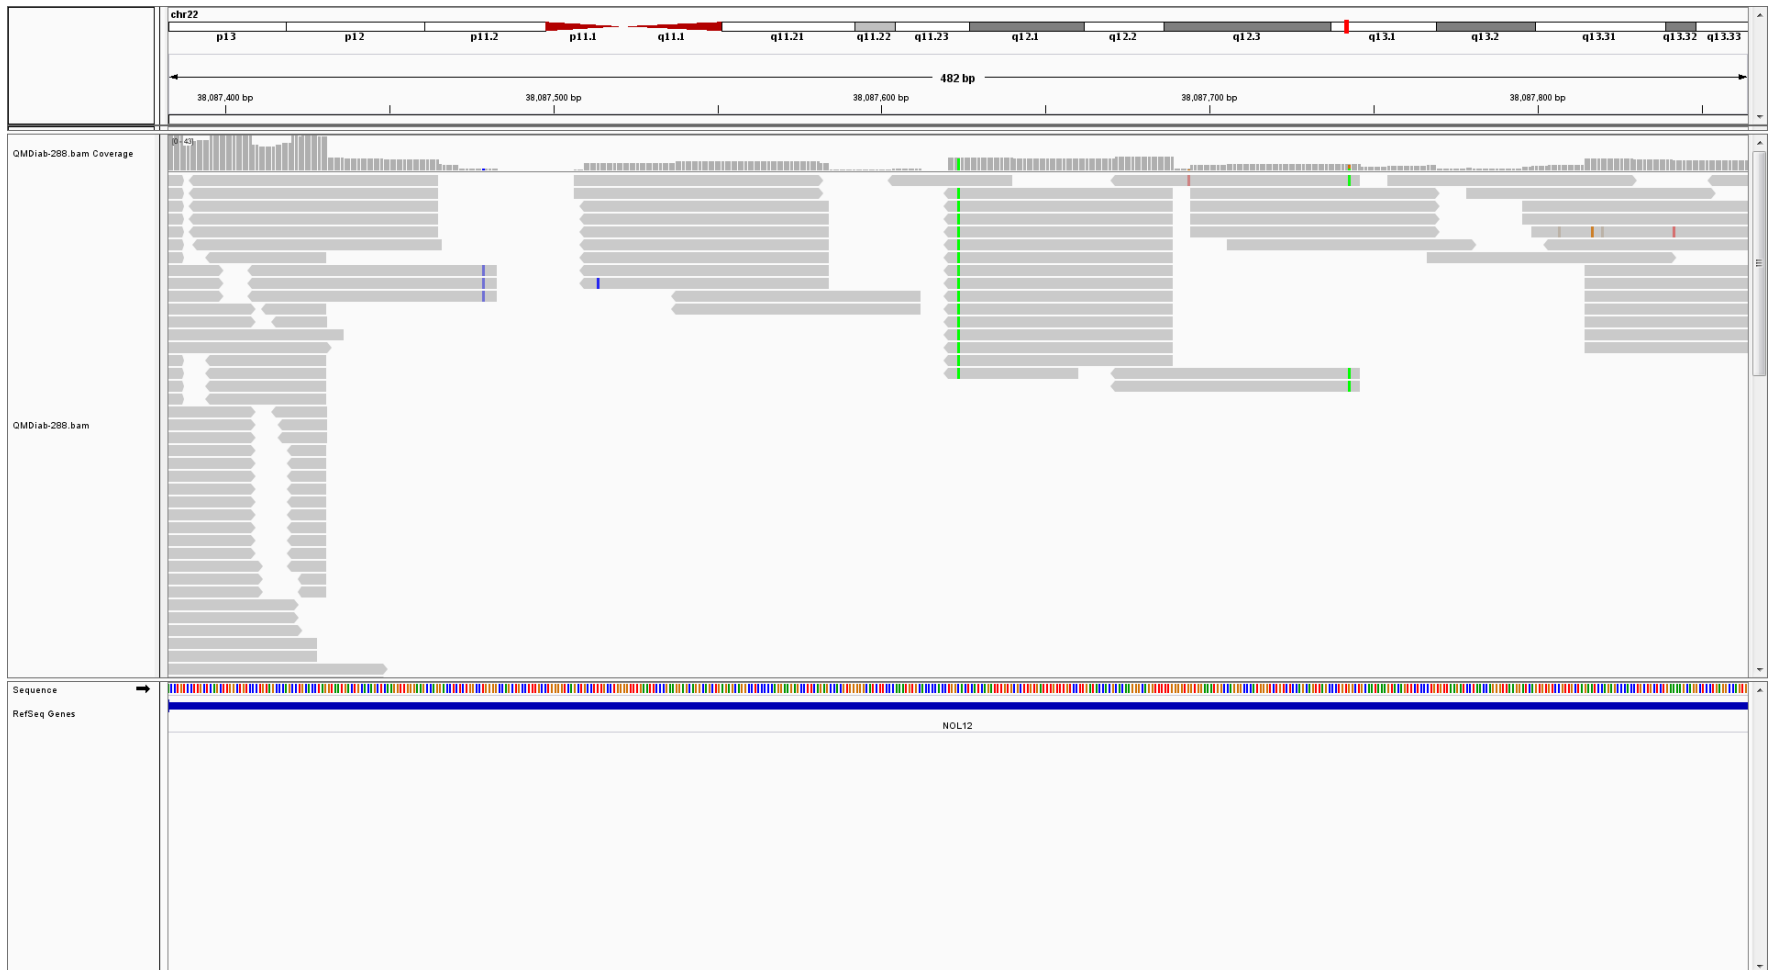

**Fig S2. Integrative genomic viewer screenshot of four nonA2I sites showing the absence of reads spanning the non-A2I sites. All the reads start (first 10 bp) or end (last 10 bp) at these non-A2I sites.**

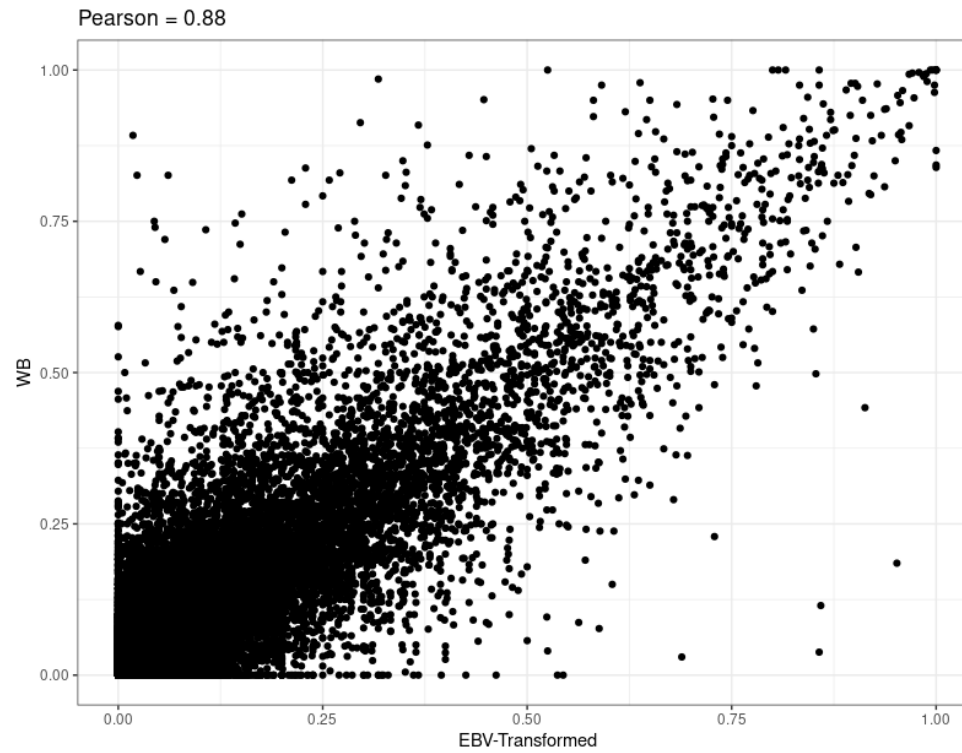

**Fig S3. Correlation of RNAe level between EBV-transformed lymphocyte and whole blood cells in the multi-tissue GTEx RNA-seq data**

UGGT1 RNAe site 2:128950992  
associated with rs11682050

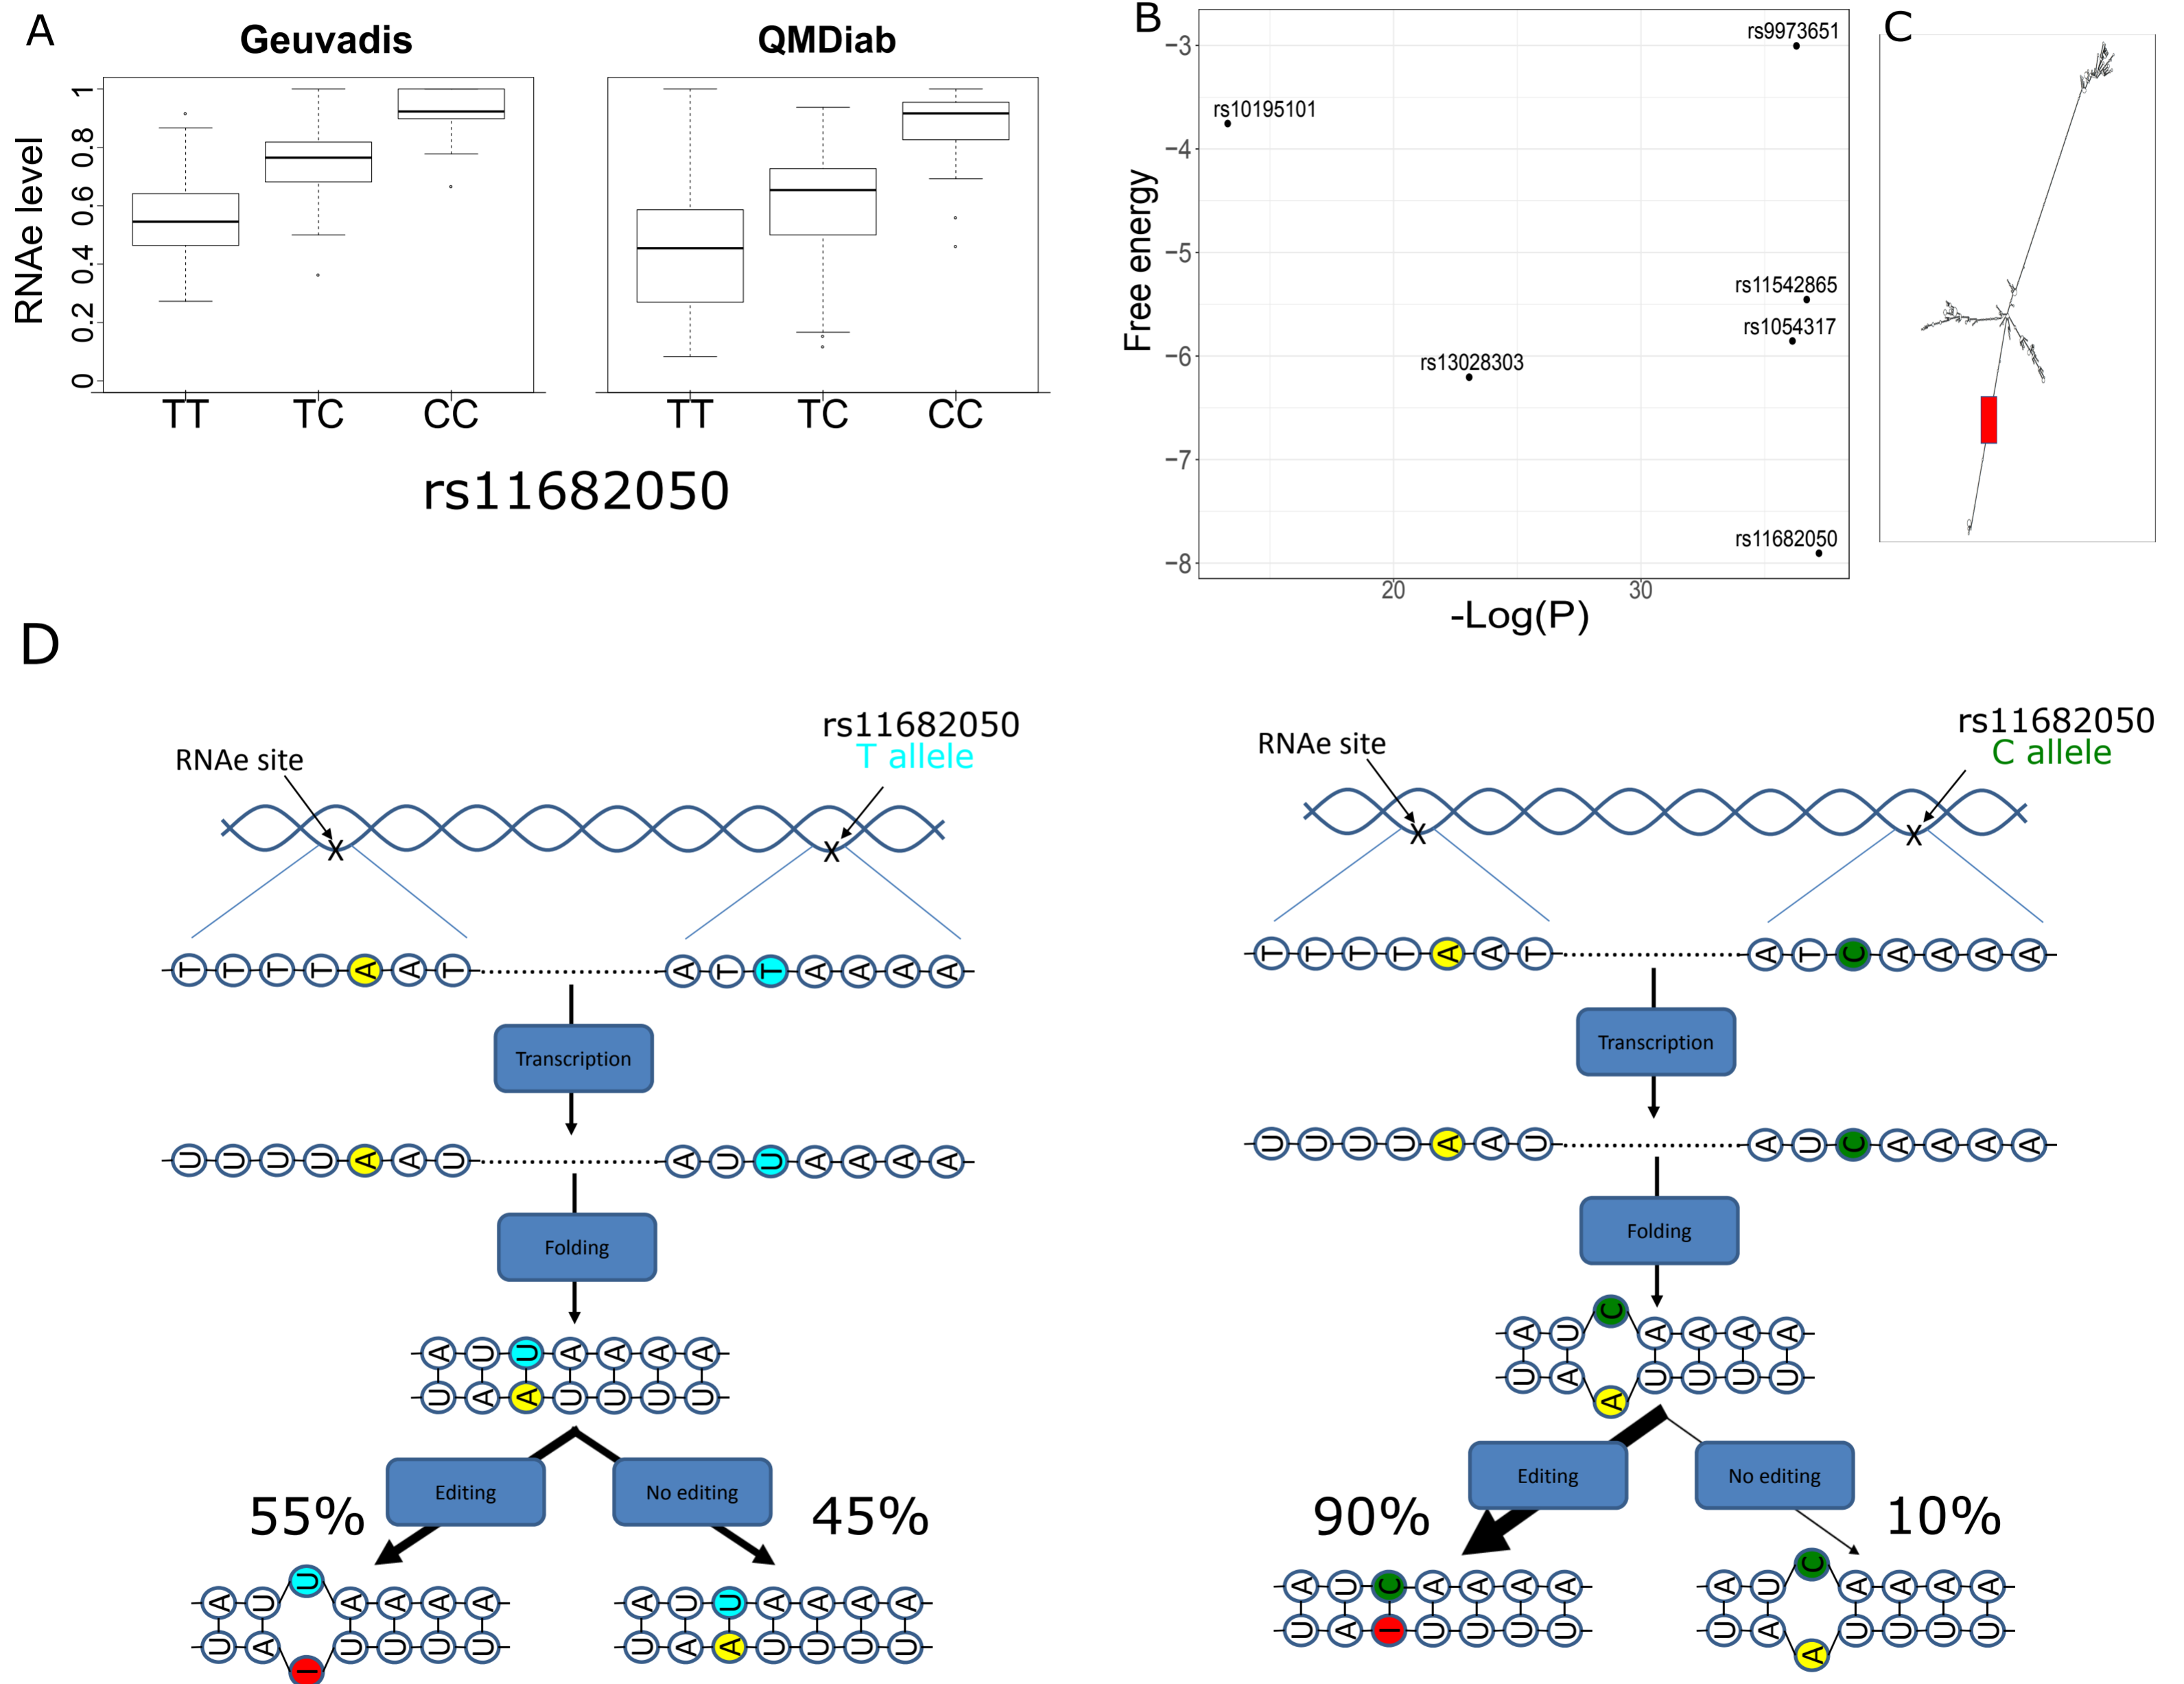

**Fig S4. The effect of the potential causal RNAe -QTL on the RNA secondary structure. In this case, the potential causal RNAe -QTL localized on the direct opposite of the RNAe site within the hairpin. A, B, C and D. please refer to Fig 3.**

NDE1 RNAe site 16:15795035  
associated with rs8048427

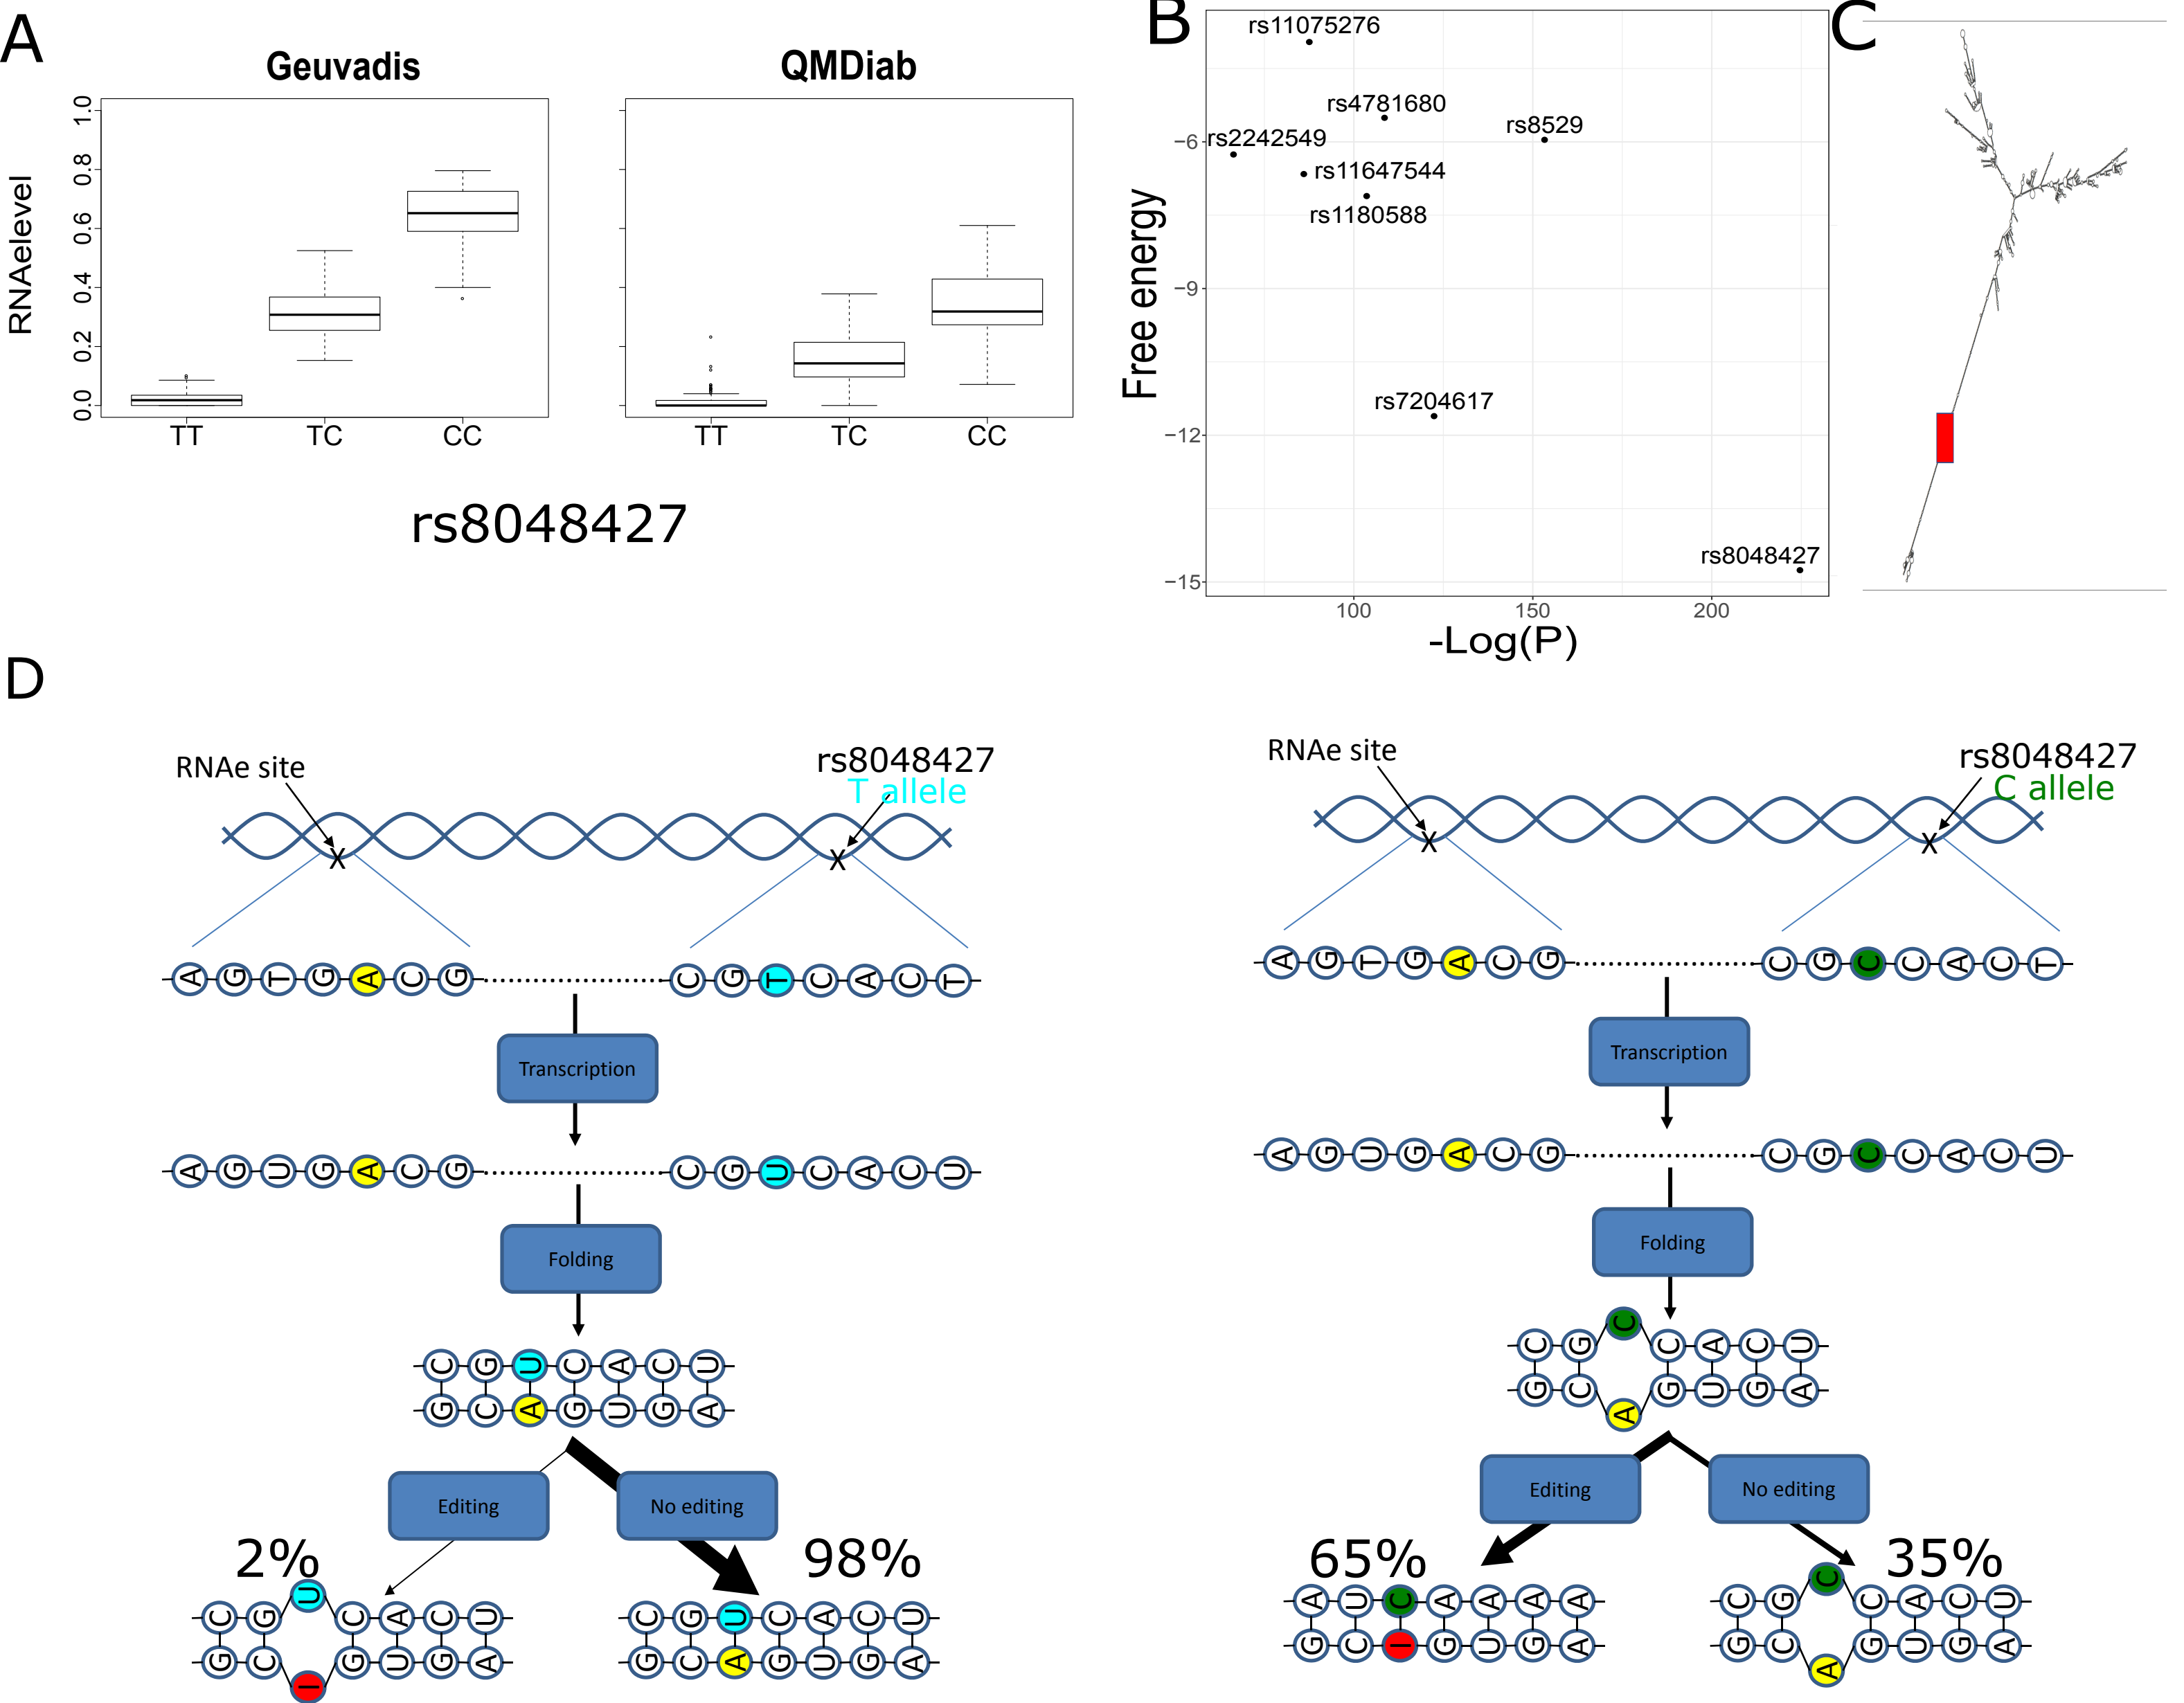

**Fig S5. The effect of the potential causal RNAe -QTL on the RNA secondary structure. In this case, the potential causal RNAe -QTL localized on the direct opposite of the RNAe site within the hairpin. A, B, C and D. please refer to Fig 3.**



H2AFV RNAe site 7:44872421  
associated with rs12155038

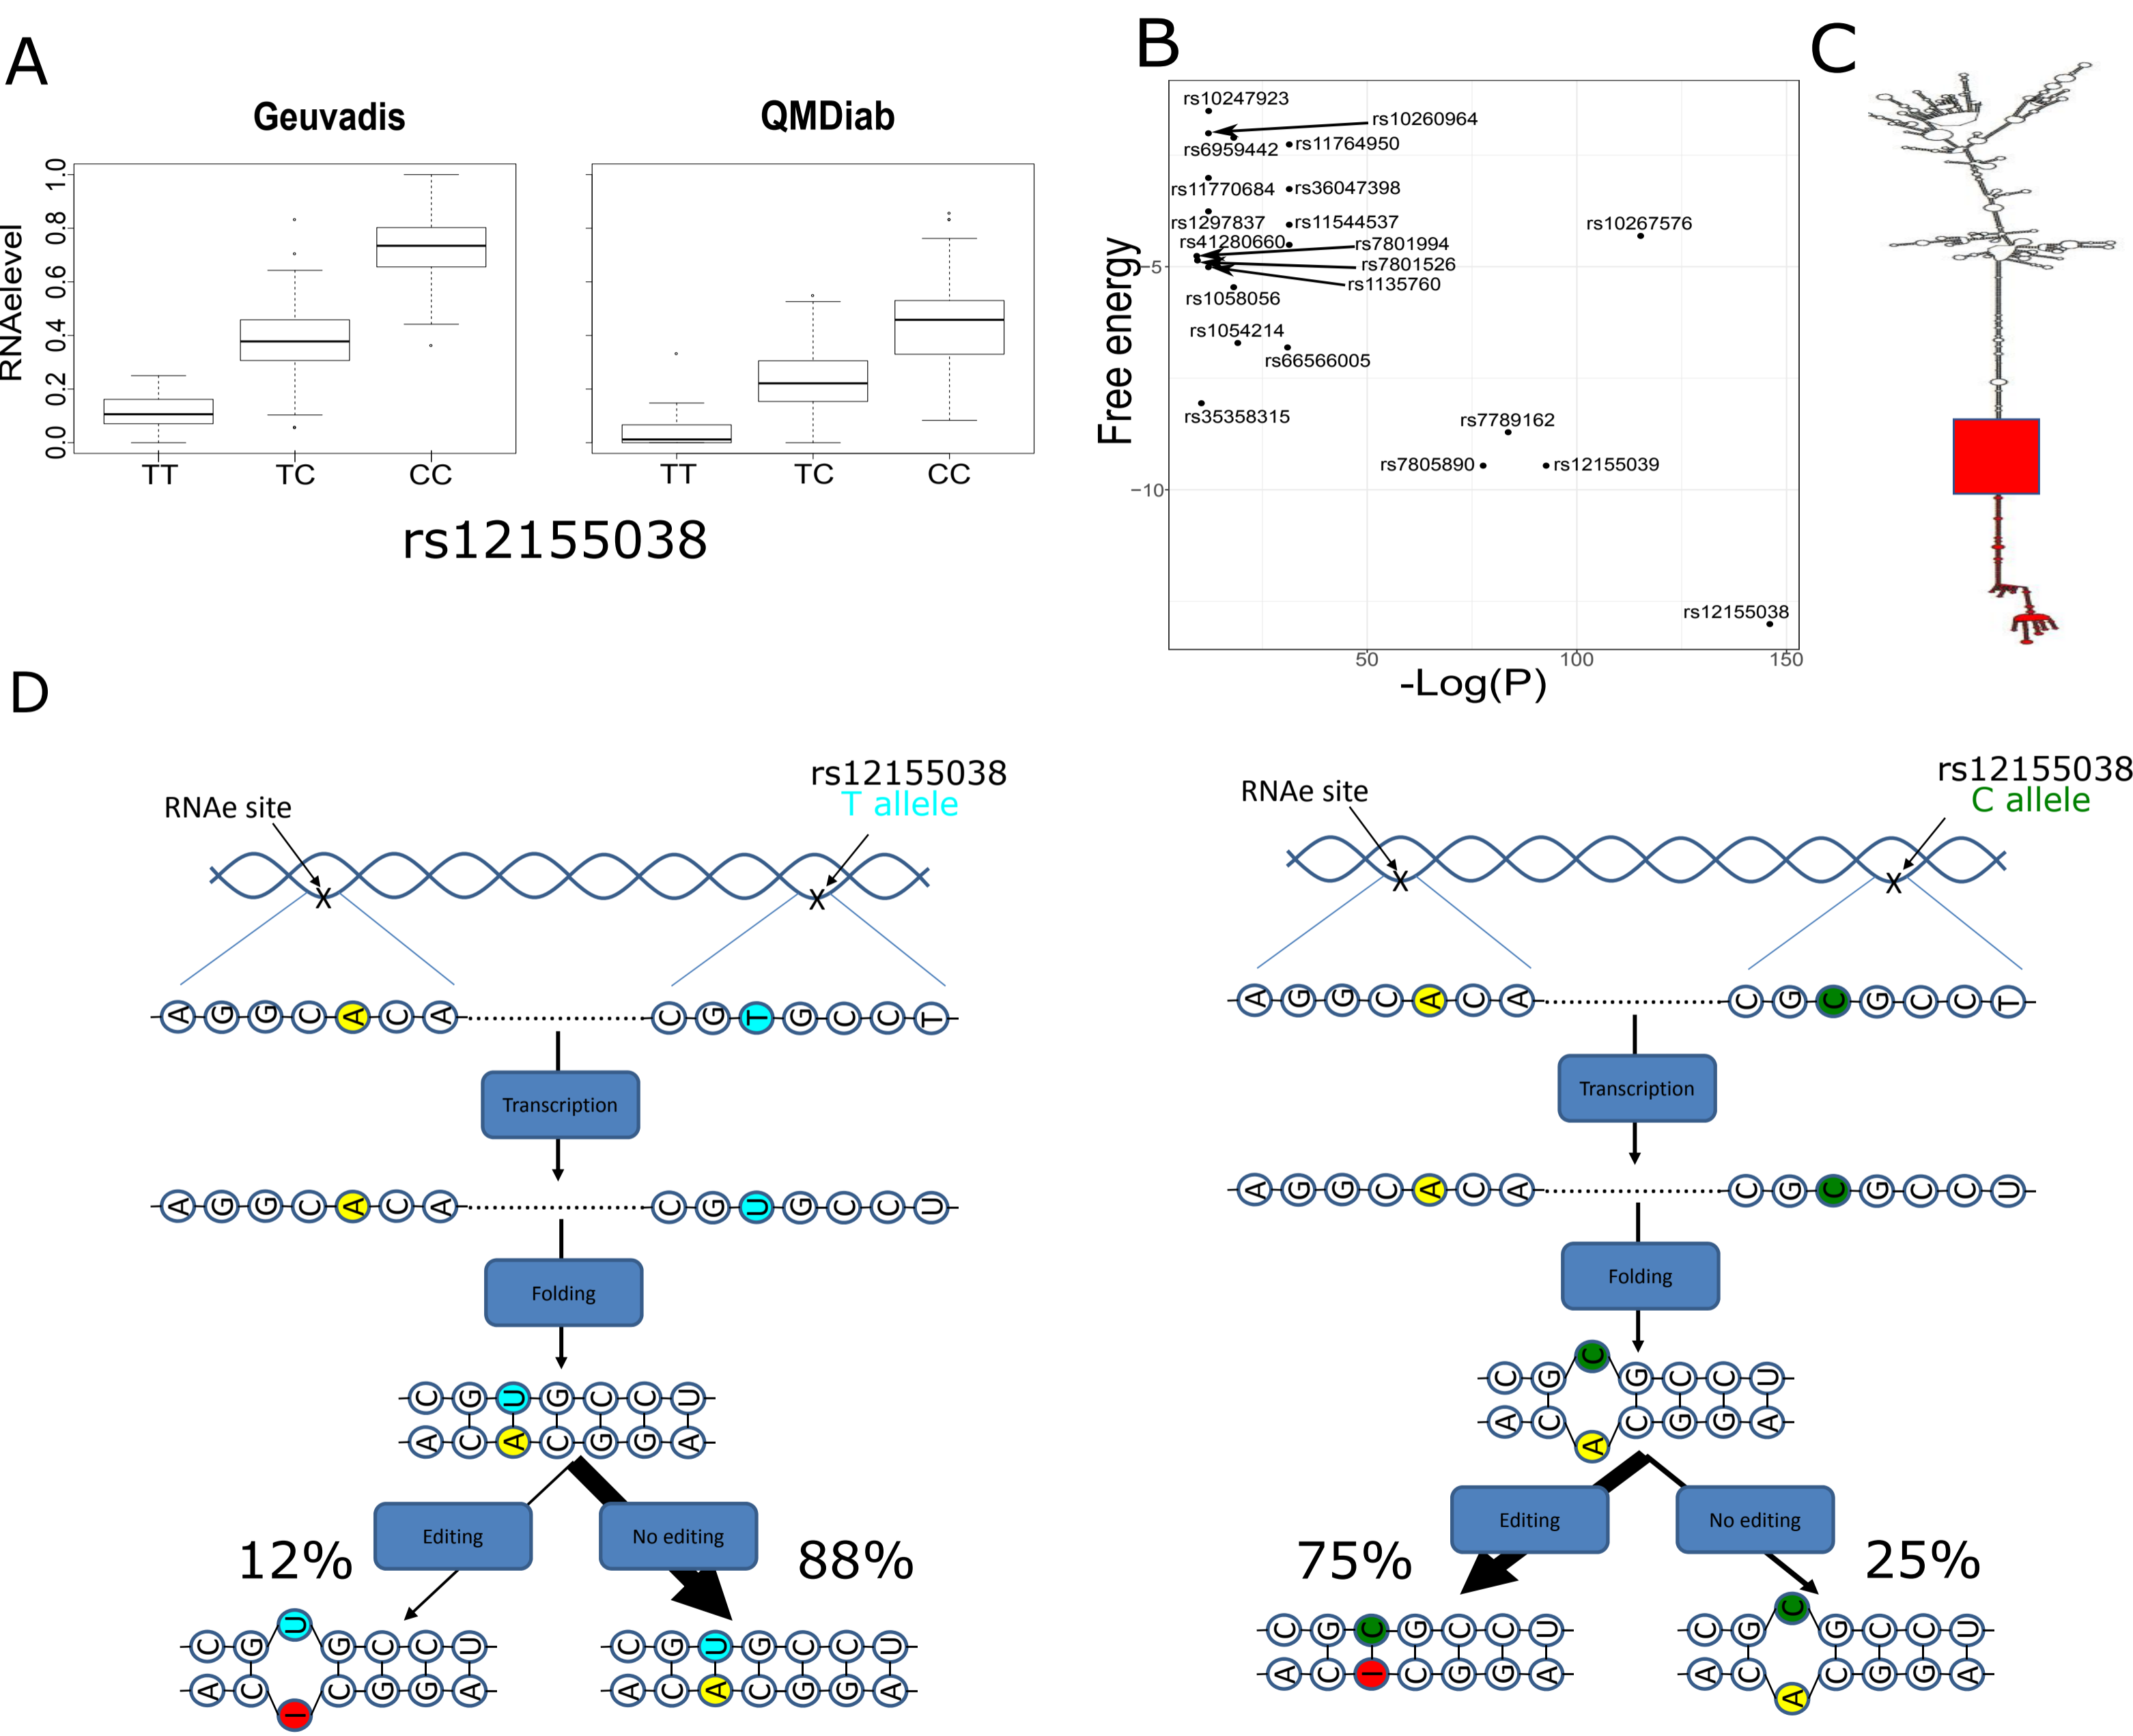

**Fig S6. The effect of the potential causal RNAe -QTL on the RNA secondary structure. In this case, the potential causal RNAe -QTL localized on the direct opposite of the RNAe site within the hairpin. A, B, C and D. please refer to Fig 3.**

RNAe site: chr6:53157537

rs1973914 (potential causal RNAe-QTL): 2.123e-43 Estimated free energy = -20  
6\_53157507-53157567 GCCCACGCTGGGGTGCAGTGGTACGATCTCAGCTCACTGCAGCCTCTTCCTCCCAATTTTC-  
6\_53158155-53158215 -CCCAGGCTGAAGTGCAGTGGCGTGATCTCAGCTCACTGCAACCTCTGCCTCTAGGGTCCA  
\*\*\*\*\*

rs2294852: P = 5.505e-10 Estimated free energy = -5.7  
6\_53157507-53157567 GCCCACGCTGGGGTGCAGTGGTACGATCTCAGCTCACTGCAGCCTCTTCCTCCCAATTTTC--  
6\_53157184-53157244 --GCAGACTCAGAAAACGTGCTTAGCCACGTTAGTGAAACTGGCACTAATTAGAAAGGC  
\*\* \* \* \* \* \* \* \* \* \* \* \* \* \* \* \*

rs1973915: P = 8.148e-33 Estimated free energy = -6.2  
6\_53157507-53157567 GCCCACGCTGGGGTGCAGTGGTACGATCTCAGCTCACTGCAGCCTCTTCCTCCCAATTTTC---  
6\_53158229-53158289 -CTTAGCCTCCAGAGTAGC--TGGGACTATAGACACACACCACCACACCCCGCTAATTTTTTGT  
\* \* \* \* \* \* \* \* \* \* \* \* \* \* \*

rs1555113: P = 2.123e-43 Estimated free energy = -8.4  
6\_53157507-53157567 GCCCACGCTGGGGTGCAGTGGTACGATCTCAGCTCACTGCAGCCTCTTCCTCCCAATTTTC-----  
6\_53157772-53157832 -----GGGAGGAGGGAGAGGGAAACAGGTCAGCCGCAGCAGCAAAGTACAACCTCTTCTTGGA  
\* \* \* \* \* \* \* \* \* \* \* \* \* \* \*

rs2294856: P = 6.259e-22 Estimated free energy = -14.55  
6\_53157507-53157567 -----GCCCACGCTGGG-GTGCAGTGGTACGATCTCAGCTCACTGCAGCCTCTTCCTCCCAATTTTC  
6\_53158305-53158365 AGGTTTCACCATATTGGTCAGGCTGGTCTGGAAGTCTGACCTCAGGGGACCCACCTGCC-----  
\* \* \* \* \* \* \* \* \* \* \* \* \* \* \*

rs9349660: P = 1.322e-42 Estimated free energy = -2.55  
6\_53157507-53157567 -----GCCCACGCTGGGGT-GCAGTGGTACGATCTCAGCTCACTGCAGCCTCTTCCTCCCAATTTTC  
6\_53154180-53154240 CTTCTGTGTCTTAGCATTCAATGGAGTAGAATGCTAAGTATAAAAAGAAAAATGGCCGG-----  
\* \* \* \* \* \* \* \* \* \* \* \* \* \* \*

rs9370190: P = 1.069e-41 Estimated free energy = -2.95  
6\_53157507-53157567 GCCCACGCTGGGGTGCAGTGGTACGATCTCAGCTCACTG--CAGCC--TCTTCCTCCCAATTTTC  
6\_53161495-53161555 CCCTACCTTC---CCCAATT-TAAGATTTACATTAGAGGGTAGCTAATCAACTTTTCATATGC  
\*\* \*\* \* \*\* \* \*\* \*\* \* \* \* \* \*\* \*\* \* \* \*\* \* \*

rs6915255: P = 2.123e-43 Estimated free energy = -4.95  
6\_53157507-53157567 GCCCACGCTGGGGTGCAGTGGTACGATCTCAGCTCA---CTGCAGCCTCTTCCTCCCAATTTTC---  
6\_53162117-53162177 -----CTGAGATTTCAATTACCTGAAATCAACCATGGTCTGAAAATACGAGGTGGGAAATTCCAG  
\*\*\* \* \* \*\* \* \*\* \*\* \* \*\* \* \* \* \* \* \* \*\* \*\*

rs974323: P = 2.909e-43 Estimated free energy = -5.1  
6\_53157507-53157567 --GCC-CACGCTGGGGTGCAGTGGTACGATCTCAGCTCACTGCAGCCTCTTCCTCCCAATTTTC  
6\_53159517-53159577 GGGCCATACACTAATTTACAGAACCTCTCCCTACTGACAGGCATCCAGATGATTCCTTG---  
\*\*\* \*\* \*\* \* \*\* \* \* \* \* \* \* \* \* \* \* \*\* \*\*

rs2294866: P = 2.123e-43 Estimated free energy = -5.4  
6\_53157507-53157567 --GCCCACGCTGGGGTGCAGTGGTACGATCTCAGCTCACTGCAGCCTCTTCCTCCCAATTTTC  
6\_53153684-53153744 GAAACCTTGCTTTACGAAAAATACAAAACCTAGCTAGACGTGGTGGCATGCTCCTGTAG--  
\*\* \* \*\* \* \* \*\* \* \* \* \* \* \* \* \* \* \* \*\* \*\*

rs3736732: P = 5.505e-10 Estimated free energy = -5.7  
6\_53157507-53157567 -GCCCACGCTGGGGTGCAGTGGT-ACGATCTCAGCTCACTGCAGCCTCTTCCTCCCAATTTTC  
6\_53160353-53160413 CTACTATCTCCTCATGCAATATTTACAAGGACTATAGGCAGGGAGTGATGCTGCAGAAG--  
\* \* \*\*\*\* \* \*\* \* \* \* \* \* \* \* \* \* \* \*\* \*\*

rs2294869: P = 2.123e-43 Estimated free energy = -5.95  
6\_53157507-53157567 GCCCACGCTGGGGTGCAGTGGTACGATCTCAGCTCACTGCAGCCTCTTCCTCCCAATTTTC-----  
6\_53155310-53155370 -----AGTCTAATTAACACTGACTTCATTCTAGAATAGGACAGAAAAAAGCAAAAAAAGGAGTT  
\* \* \* \* \* \* \* \* \* \* \* \* \* \* \* \* \* \* \* \* \* \* \* \*

rs2294868: P = 2.909e-43 Estimated free energy = -6  
6\_53157507-53157567 GCCCACGCTGGGGTGCAGTGGTACGATCTCAGCTCACTGCAGCCTCTTCCTCCCAATTTTC---  
6\_53155081-53155141 -GAAATATTTTTCTCTATTAATATTGCCATGTATAATAATAAATCTG--TAAGAGTTCTCTT  
\* \* \* \* \* \* \* \* \* \* \* \* \* \* \* \* \* \* \* \* \* \* \* \*

```

rs3817960: P = 2.123e-43 Estimated free energy = -7.95
6_53157507-53157567 -----GCCCACGCTGGGGTGCAGTGGTACGATCTCAAGCTCACTGCAGCCTCTTCCTCCCAATTTTC
6_53152815-53152875 ATTGAATGGCTTCACATGAGGACAGAGCATCTGCCTAAGAGGGAAACCACCTGTAACACT-----
                * * * * * * * * * * * * * * * * * * * * * * * * * * * * * *
rs6907982: P = 2.909e-43 Estimated free energy = -9.5
6_53157507-53157567 GCCCACGCTGGGGTGCAGTGGTACGATCTCAAGCTCACTGCAGCCTCTTCCTCCCAATTTTC-
6_53152728-53152788 CTCCCTTTTGGACTGTAACAA-ACACAATTAGATCCTCTCTGCTTAGGGTCTAAGAGGTCT
                **      ***  ** *      **      * ** **      * ** *      * **
rs2294867: P = 3.907e-26 Estimated free energy = -10.55
6_53157507-53157567 ---GCCCACGCTGGGGTGCAGTGGTACGATCTCAAGCTCACTGCAGCCTCTTCCTCCCAATTTTC
6_53153924-53153984 CTTGCTAAAGCAGCTGTGAATTTATGCCA-CAGAATTAAATAAACAAAAATACCAAAGACT--
                **  * ** *  * ** * *  * * * * *  * * * * *  * * * * *  * *
rs2294865: P = 2.123e-43 Estimated free energy = -10.65
6_53157507-53157567 GCCCACGCTGGGGTGCAGTGGTACG-ATCTCAAGCTCACTGCAGCCTCTTCCTCCCAATTTTC
6_53153235-53153295 -CCCCTAATAAGCAAAAGCAAAAAGGATTGCTATAAAGTCCAATACTTTCAAATTTAAACA
                ***      *  *      **      * * * * *  * * * * *      ***      **
rs6458913: P = 2.123e-43 Estimated free energy = -11.45
6_53157507-53157567 ----GCCCACGCTGGGGTGCAGTGGTACGATCTCAAGCTCACTGCAGCCTCTTCCTCCCAATTTTC
6_53152612-53152672 CAGTGTTCCTGG-GGAATTCAAAGCCATGTGCAGTGCACAACACTGACCCTGTTTTCTGGC---
                *  *  *  ** * ** * * * *  * * * * *  * * * * *  * *

```

**Fig S7. Pairwise local alignment of the reverse complementary DNA sequence surrounding the RNAe site chr6:53157537 and the DNA sequences surrounding the associated SNPs (Fig 3).** The first pairwise alignment is the potential causal RNAe-QTL (rs1973914) with the lowest estimated free energy. In each pairwise alignment, the RNAe site is colored by yellow and the associated SNP is colored in magenta.



**Fig S8. Pairwise local alignment of the reverse complementary DNA sequence surrounding the RNAe site chr2:128950992 and the DNA sequences surrounding the associated SNPs (Fig S3).** The first pairwise alignment is the potential causal RNAe-QTL (rs11682050) with the lowest estimated free energy. In each pairwise alignment, the RNAe site is colored by yellow and the associated SNP is colored in magenta.

RNAe site: chr16:15795035

rs8048427 (potential causal RNAe-QTL): P = 1.467e-225 Estimated free energy = -17.15  
16\_15795005-15795065 -GTTGCTTGGACCCGGGAGGTGGAGGGTGCAGTGAGCCAAGATTGCGCTACTGTACTCCAG  
16\_15794355-15794415 AATCGCTTGAACCTAGGAGGCGGAGGCTGCAGTGAGCCGAAATTGCACCACTACACTCCA-  
\* \* \* \* \*

rs2242549: P = 2.698e-67 Estimated free energy = 2.5  
16\_15795005-15795065 GTTGCTTGGACCCGGGAGGTGGAGGGTGCAGTGAGCCAAGATTGCGCTACTGTACTCCAG---  
16\_15798180-15798240 ---GCTTTGAAAAACCTTCTCCACCCACCCCGAAACCAATTTTCAGCTGATTAATCAATCA  
\* \* \* \* \*

rs8529: P = 3.334e-154 Estimated free energy = -6.55  
16\_15795005-15795065 GTTGCTTGGACCCGGGAGGTGGAGGGTGCAGTGAGCCAAGATTGCGCTACTGTACTCCAG--  
16\_15795442-15795502 --TCCTAACATGCAGTGATGAGTGGACACCCATGGTGCCTGGAAATCCCACGTTACGTC  
\* \* \* \* \*

rs11075276: P = 1.763e-88 Estimated free energy = -6.7  
16\_15795005-15795065 --GTTGCTTGGACCCGGGAGGTGGAGGGT-GCAGTGGA-GCCAAGATTGCGCTACTGTACTCCAG  
16\_15799798-15799858 TTTTTTTTTTTTTTTTTTTTGGAGACGGAGTCTCACCCCTGTCGCCTAGGCTGGAGTGCAGTGGC----  
\* \* \* \* \*

rs11647544: P = 6.093e-87 Estimated free energy = -7.15  
16\_15795005-15795065 -GTTGCTTGGACCCGGGAGGTGGAGGGTGCAGTGAGCCAAGATTGCGCTACTGTACTCCAG  
16\_15796538-15796598 GAGTCAGCAAACACTTTCACAAAACGTCAAATGGTGGCTGGGTACAGTGGCTCACACCT-  
\* \* \* \* \*

rs4781680: P = 1.722e-109 Estimated free energy = -8.35  
16\_15795005-15795065 -GTTGC-TTGGACCCGGGAGGTGGAGGGTGCAGTGAGCCAAGATTGCGCTACTGTACTCCAG  
16\_15799997-15800057 TGTGAAGCTGGGCTAGGAGTGTCTACTTTGAAAGTGGCTGCAGCTTTAAGTATT-TATTCTT-  
\* \* \* \* \*

rs7204617: P = 2.459e-123 Estimated free energy = -14.35  
16\_15795005-15795065 -GTTGCTTGGACCCGGGAGGTGGAGGGTGCAGTGAGCCAAGATTGCGCTACTGTACTCCAG  
16\_15792203-15792263 TTTTTTCTGAGACAAGGTCTCGCTTCATCACCCAGGCTGGAGTGCAGTGGCTGGGAACA-  
\* \* \* \* \*

```

rs1180588: P = 1.67e-104 Estimated free energy = -16.15
16_15795005-15795065      GTTGCTTGGACCCGGGAGGTGGAGGGTGCAGTGAGCCAAGATTGCGCTACTGTACTCCAG-----
16_15795018-15795078      -----TCTGTTGCCCAGGCTGGAG--TACAGTAGCGCAATCTTGGCTCACTGCACCCTCCACCTCCC
                          *  *  *      *  *****  *  *****  ***  ***      *****  **  *

```

**Fig S9. Pairwise local alignment of the reverse complementary DNA sequence surrounding the RNAe site chr16:15795035 and the DNA sequences surrounding the associated SNPs (Fig S4).** The first pairwise alignment is the potential causal RNAe-QTL (rs8048427) with the lowest estimated free energy. In each pairwise alignment, the RNAe site is colored by yellow and the associated SNP is colored in magenta.



RNAe site: chr7:44872421

rs12155038 (potential causal RNAe-QTL): P = 6.706e-147 Estimated free energy = -13  
7\_44872391-44872451 -TTTTTTTTTAATCGGTCCATACCACCGTACACGGACACCAGGGTCGATAAACGTCCCGACT  
7\_44872947-44873007 ATGTTTTTTTAATCGGCCACACCACCGTGCACGGACATCAGGGTCGATGAGTCCTCCGAC-  
\* \*\*\*\*\* \*\* \*\*\*\*\* \*\*\*\*\* \*\*\*\*\* \* \*\*\*\*\*

rs10247923: P = 4.402e-13 Estimated free energy = -1.5  
7\_44872391-44872451 ---TTTTTTTTTAATCGGTCCATACCACCGTACACGGACACCAGGGTCGATAAACGTCCCGACT  
7\_44877167-44877227 CAGGGTCGATCACCTCTCCCACTCCACCCTACTAATGGACTGGGTCTCCAA---CTCCGACG  
\* \* \* \*\* \*\*\*\*\* \*\* \* \* \*\*\*\*\*

rs10260964: P = 5.001e-13 Estimated free energy = -2  
7\_44872391-44872451 TTTTTTTTTAATCGGTCCATACCACCGTACACGGACACCAGGGTCGATAAACGTCCCGACT---  
7\_44873414-44873474 GTCTCAGAGATGACTGGTTCTTTCA-ACAACGACGGTGTAAT-ATCTACACCTCGGATTC  
\* \* \* \* \* \* \* \*\* \*\* \* \*\* \* \* \* \*

rs6959442: P = 2.671e-32 Estimated free energy = -2.25  
7\_44872391-44872451 TTTTTTTTTAATCGGTCCATACCACCGTACACGGACACCAGGGTCG-ATAAACGTCCCGACT  
7\_44869001-44869061 ACGGGTCGATTA AAAACATAAAAAT-CATCTGCACCCCAAAGTGGTACAACCGGTCTGACC  
\* \* \* \*\*\*\* \* \* \* \* \* \* \* \* \* \* \* \* \* \* \*

rs11770684: P = 5.001e-13 Estimated free energy = -3  
7\_44872391-44872451 -TTTTTTTTTAATCGGTCCATACCACCGTACACGGACACCAGGGTCGATAAACGTCCCGACT  
7\_44868072-44868132 AAATTCGGAGACAGAAGTAGGAATTTACCACTACTATCATGGATGGAGTGAGACTAGAG-  
\*\* \* \* \* \*\* \* \* \* \* \* \* \* \* \* \*

rs36047398: P = 2.671e-32 Estimated free energy = -3.25  
7\_44872391-44872451 -----TTTTTTTTTAATCGGTCCATACCACCGTACACGGACACCAGGGTCGATAAACGTCCCGACT  
7\_44873344-44873404 AACACACGATACGGTTTTTTGTAACCTGACCAT-CTATCTTTTACTGTCTCGATCCTAAGT-----  
\*\*\*\*\* \*\* \* \*\*\*\*\* \* \* \* \* \* \* \* \* \* \* \* \*

rs1297837: P = 5.001e-13 Estimated free energy = -3.75  
7\_44872391-44872451 TTTTTTTTAATCGGTCCATAACCACCGTA-CACGGACACCAGGGT---CGATAAACGTCCCGACT  
7\_44869507-44869567 -TCGTCGAAACTAAATTTTCATTAAGTCTCGCGAAAAGGAACGTACTCATTAAGACTTA---  
\* \* \*\* \* \* \*\* \* \* \* \* \* \* \* \* \* \* \* \* \* \* \* \* \*

rs11544537: P = 2.671e-32 Estimated free energy = -4.05  
7\_44872391-44872451 TTTTTTTTAATCGGTCCATAACCACCG---TACACGGACACCAGGGTCGATAAACGTCCCGACT  
7\_44868037-44868097 -TATCATGGATGGAGTGAGACTAGAGACTTACTCTTGTGTACATTCTGTGAATCGTGTCAA--  
\* \* \* \* \* \* \* \* \* \* \* \* \* \* \* \* \* \* \* \* \* \* \* \* \* \* \*

rs10267576: P = 4.212e-116 Estimated free energy = -4.3  
7\_44872391-44872451 TTTTTTTTAATCGGTCCATAACCACCGTACACGGACACCAGGGTCGA--TAAACGTCCCGACT  
7\_44870903-44870963 GTTTTTTGTATC--TTTATCTTGTTGATCCAGTACATGAGACCCGAATCGAGAGTGTCAATA  
\*\*\*\*\* \*\* \* \*\* \* \* \* \* \* \* \* \* \* \* \* \* \* \* \* \* \*

rs41280660: P = 2.671e-32 Estimated free energy = -4.5  
7\_44872391-44872451 --TTTTTTTAAATCGGTCCATAACCACCGTACACGGACACCAGGGTCGATAAACGTCCCGACT  
7\_44874936-44874996 TATTGTTAAGATTCGAAAAGTATTACTAGACTTATTTAT-AAAGTGGAAGATCGGTATACA-  
\*\* \*\* \* \*\* \*\* \*\* \* \* \* \* \* \* \* \* \* \* \* \* \* \* \* \* \*

rs7801994: P = 3.043e-10 Estimated free energy = -4.75  
7\_44872391-44872451 --TTTTTTTAAATCGGTCCATAACCACCGTACACGGACACCAGGGTCGATAAACGTCCCGACT-  
7\_44872646-44872706 GGTGATGTGAGGTCGGATC-CACTGTCTCACACTGAGACAGAGTTTTTTT--TTTTAGGGTTG  
\* \* \* \* \* \* \* \* \* \* \* \* \* \* \* \* \* \* \* \* \* \* \* \* \* \* \*

rs7801526: P = 2.057e-10 Estimated free energy = -4.85  
7\_44872391-44872451 TTTTTTTTAATCGGTCCATAACCACCGTACACGGACACCAGG-GTCGATAAACGTCCCGACT-----  
7\_44872236-44872296 -----CCTAATATCCGTATTCGGTGGTACG-GGACGCGATTTCATTGACAATGAACTCAATTACATG  
\*\*\*\*\* \*\* \* \* \* \* \* \* \* \* \* \* \* \* \* \* \* \* \* \* \* \* \*

rs1135760: P = 5.001e-13 Estimated free energy = -5  
7\_44872391-44872451 -TTTTTTTTAATCGGTC---CATACCACCGTACACGGACACCAGGGTCGATAAACGTCCCGACT  
7\_44868417-44868477 CTTCACTTAGGAAGGTCACCTCGAACCTTCTTTCGTGGAACCCGTGTCTAC---TCTTCGAAC-  
\*\* \*\* \*\*\*\* \* \*\*\* \* \* \* \* \* \* \* \* \* \* \* \* \* \* \* \* \* \* \* \*

rs1058056: P = 4.745e-19 Estimated free energy = -5.45  
7\_44872391-44872451 TTTTTTTTTAATCGGTCCATAACCACCGTACACGGACACCAGGGTCGATAAACGTCCCGACT-----  
7\_44868349-44868409 -----ACTACGGAATAAAATCGGACCACCTCTGGGACTCGTATATTTAAACGACACGATACGGTG  
\*\* \* \* \* \* \* \* \* \* \* \* \* \* \* \* \* \* \* \* \* \* \* \* \* \* \* \*

rs1054214: P = 5.056e-20 Estimated free energy = -6.7  
7\_44872391-44872451 TTTTTTTTTAATCGGTCCATAACCACCGTACACGGACACCAGGGTCGATAAACGTCCCGACT--  
7\_44871918-44871978 --CAGGGTAATTG-TCCGTATCATAAAAGTACAGACACACTAGTCTCTGTAAGTTTATATTGA  
\*\*\*\* \* \*\*\* \*\* \*\* \* \*\* \* \* \* \* \* \* \* \* \* \* \* \* \* \* \* \* \* \*

rs66566005: P = 6.869e-32 Estimated free energy = -6.8  
7\_44872391-44872451 TTTTTTTTTAATCGGTCCATAACCACCGTACACGGACACCAGGGTCGATAAACGTCCCGACT-  
7\_44868941-44869001 -AGAGTTTGAGGACTGGAGTCCGCTAGGCGGCAGATTTCGGAAGGTTTCACGACCCTAATG  
\*\*\* \* \* \* \* \* \* \* \* \* \* \* \* \* \* \* \* \* \* \* \* \* \* \* \* \* \*

rs35358315: P = 2.382e-11 Estimated free energy = -8.05  
7\_44872391-44872451 TTTTTTTTTAATCGGTCCATAACCACCGTACACGGACACCAGGGTCGATAAACGTCCCGACT---  
7\_44876848-44876908 --GACCCTAATGTCCGCACACGGTGGTGTGGAACGACTAAAAAC-ATAAAAATTTCAAGTCGT  
\*\*\*\* \*\* \*\* \*\* \* \* \* \* \* \* \* \* \* \* \* \* \* \* \* \* \* \* \* \* \*

rs7789162: P = 1.67e-84 Estimated free energy = -8.7  
7\_44872391-44872451 TTTTTTTTTAATCGGTCCATAACCACCGTACACGGACACCAGGGTCGATAAACGTCCCGACT--  
7\_44872870-44872930 -CTTGGGCCCTCCGCCTCGAACGTCACTCGGTTCCTACCGCGGT-GACGTGAGGTTCGAACCGC  
\*\* \*\* \* \* \* \* \* \* \* \* \* \* \* \* \* \* \* \* \* \* \* \* \* \* \* \* \*

```

rs7805890: P = 1.533e-78 Estimated free energy = -9.45
7_44872391-44872451      --TTTTTTTTTAATCGGTCCATACCACCGTACACGGACACCAGGGTCGATAAACGTCCCGACT
7_44872881-44872941      CTCTTACTGCACTTGGGCCCT-CCGCCTCGAACCGT-CACTCGGTTCTACCGCGGTGACGTGA
                        ** * * * * * * * * * * * * * * * * * * * * * * * * * *

```

```

rs12155039: P = 1.465e-93 Estimated free energy = -9.45
7_44872391-44872451      -----TTTTTTTTTAATCGGTCCATACCACCGTACACGGACACCAGGGTCGATAAACGTCCCGACT
7_44873095-44873155      GTTGTACCATTTTGCAGCAGAGCCGGTCCGCACCAGTGCAGGACATTAGGGTCGTGA-----
                        * * * * * * * * * * * * * * * * * * * * * * * * * *

```

**Fig S10. Pairwise local alignment of the reverse complementary DNA sequence surrounding the RNAe site chr7:44872421 and the DNA sequences surrounding the associated SNPs (Fig S5).** The first pairwise alignment is the potential causal RNAe-QTL (rs12155038) with the lowest estimated free energy. In each pairwise alignment, the RNAe site is colored by yellow and the associated SNP is colored in magenta.

**Table S1. Characteristics of RDD sites and RNAe-QTLs detected.** RDD sites and associated SNP positions are provided in the HG19 human reference genome.

**Table S2. RNAe-QTLs with the lowest free energy in the pairwise sequence alignment with RNAe site.** RNAe sites and RNAe-QTL positions are provided in the HG19 human reference genome.

**Table S3. Allele specific editing for RNAe sites and RNAe-QTLs falling on the same reads or mates.** RNAe sites and RNAe-QTL positions are provided in the HG19 human reference genome.
